# Title

## AMELIE 3: Fully Automated Mendelian Patient Reanalysis at Under 1 Alert per Patient per Year

### Authors

Johannes Birgmeier<sup>1</sup>, Ethan Steinberg<sup>1</sup>, Ethan E. Bodle<sup>2</sup>, Cole A. Deisseroth<sup>1</sup>, Karthik A. Jagadeesh<sup>1</sup>, Jennefer N. Kohler<sup>3</sup>, Devon Bonner<sup>3</sup>, Shruti Marwaha<sup>3,4</sup>, Julian A. Martinez-Agosto<sup>5,6,8</sup>, Stan Nelson<sup>5,7</sup>, Christina G. Palmer<sup>5,8</sup>, Joy D. Cogan<sup>9</sup>, Rizwan Hamid<sup>9</sup>, Joan M. Stoler<sup>10</sup>, Joel B. Krier<sup>11</sup>, Jill A. Rosenfeld<sup>12</sup>, Paolo Moretti<sup>13</sup>, David R. Adams<sup>14,15</sup>, Vandana Shashi<sup>16</sup>, Elizabeth A. Worthey<sup>17,18</sup>, Christine M. Eng<sup>12</sup>, Euan A. Ashley<sup>3,4,19</sup>, Matthew T. Wheeler<sup>3,4</sup>, Undiagnosed Diseases Network, Peter D. Stenson<sup>20</sup>, David N. Cooper<sup>20</sup>, Jonathan A. Bernstein<sup>2</sup>, and Gill Bejerano<sup>1,2,21,22\*</sup>

### Affiliations

<sup>1</sup> Department of Computer Science, Stanford University, Stanford, CA, USA

<sup>2</sup> Department of Pediatrics, Stanford School of Medicine, Stanford, CA, USA

<sup>3</sup> Center for Undiagnosed Diseases, Stanford University, Stanford, CA, USA

<sup>4</sup> Department of Medicine, School of Medicine, Stanford University, Stanford, CA, USA

<sup>5</sup> Department of Human Genetics, David Geffen School of Medicine, University of California, Los Angeles, CA, USA

<sup>6</sup> Department of Pediatrics, Division of Medical Genetics, David Geffen School of Medicine, University of California, Los Angeles, CA, USA

<sup>7</sup> Department of Pathology and Laboratory Medicine, David Geffen School of Medicine, University of California, Los Angeles, CA, USA

<sup>8</sup> Department of Psychiatry and Biobehavioral Sciences, David Geffen School of Medicine, University of California, Los Angeles, CA, USA

<sup>9</sup> Department of Pediatrics, Vanderbilt University Medical Center, Nashville, TN, USA

<sup>10</sup> Division of Genetics and Genomics, Department of Medicine, Boston Children's Hospital, Harvard Medical School, Boston, MA, USA

<sup>11</sup> Dept of Medicine, Brigham and Women's Hospital, Harvard Medical School, Boston, MA, USA

<sup>12</sup> Dept of Molecular and Human Genetics Baylor College of Medicine, Houston, TX, USA

<sup>13</sup> Department of Neurology University of Utah and George E. Wahlen VA Medical Center Salt Lake City, UT, USA

<sup>14</sup> NIH Undiagnosed Diseases Program, Common Fund, Office of the Director, NIH, Bethesda, MD, USA

<sup>15</sup> Office of the Clinical Director, National Human Genome Research Institute, NIH, Bethesda, MD, USA

<sup>16</sup> Division of Medical Genetics, Department of Pediatrics, Duke Health, Durham, NC, USA

<sup>17</sup> Software Development and Informatics, HudsonAlpha Institute for Biotechnology, Huntsville, AL, USA

<sup>18</sup> Departments of Pediatric and Pathology, University of Birmingham School of Medicine, Birmingham, AL, USA

<sup>19</sup> Department of Genetics, School of Medicine, Stanford University, Stanford, CA, USA

<sup>20</sup> Institute of Medical Genetics, School of Medicine, Cardiff University, Heath Park, Cardiff, UK

<sup>21</sup> Department of Developmental Biology, Stanford University, Stanford, CA, USA

<sup>22</sup> Department of Biomedical Data Science, Stanford University, Stanford, CA, USA

\* To whom correspondence should be addressed, [bejerano@stanford.edu](mailto:bejerano@stanford.edu)

# Abstract

**Background:** Many thousands of patients with a suspected Mendelian disease have their exomes/genomes sequenced every year, but only about 30% receive a definitive diagnosis. Since a novel Mendelian gene-disease association is published on average every business day, thousands of undiagnosed patient cases could receive a diagnosis each year if their genomes were regularly compared to the latest literature. With millions of genomes expected to be sequenced for rare disease analysis by 2025, and considering the current publication rate of 1.1 million new articles per annum in PubMed, manually reanalyzing the growing cases of undiagnosed patients is not sustainable.

**Methods:** We describe a fully automated reanalysis framework for patients with suspected, but undiagnosed, Mendelian disorders. The presented framework was tested by automatically parsing all ~100,000 newly published peer reviewed papers every month and matching them on genotype and phenotype with all stored undiagnosed patients. If a new article contains a possible diagnosis for an undiagnosed patient, the system provides notification. We test the accuracy of the automatic reanalysis system on 110 patients, including 61 with available trio data.

**Results:** Even when trained only on older data, our system identifies 80% of reanalysis diagnoses, while sending only 0.5-1 alerts per patient per year, a 100-1,000-fold efficiency gain over manual literature surveillance of equivalent yield.

**Conclusion:** We show that automatic reanalysis of patients with suspected Mendelian disease is feasible and has the potential to greatly streamline diagnosis. Our system is not intended to replace clinical judgment. Rather, clinical diagnostic services could greatly benefit from a modest re-allocation of time from manual literature exploration to review of automated reanalysis alerts. Our system additionally supports a new paradigm for medical IT systems: proactive, continuously learning and consequently able to autonomously identify valuable insights as they emerge in digital health records. We have launched automated patient reanalysis, trained on the latest data, with user accounts and daily literature updates at

<https://AMELIE.stanford.edu>.

# Introduction

Severe genetic diseases affect tens of thousands of infants born every year worldwide. Many Mendelian conditions such as intellectual disability are diagnosed later in life for a total estimate of 0.5-1% of the 7.8 billion world population<sup>1,2</sup>. Millions of such patients are projected to be sequenced over the next few years<sup>3</sup>. Currently, for an estimated 30% of patients<sup>4</sup> with a presumed Mendelian disease, a definitive diagnosis is arrived at immediately after exome sequencing<sup>5</sup>. Conversely, 70% of patients do not receive a diagnosis (for a variety of reasons<sup>6</sup>). However, approximately 250 novel gene-disease associations are identified every year<sup>6-8</sup>. Reanalysis of exomes of patients with previously undiagnosable genetic conditions results in a significant fraction (4%-30%) of these cases becoming diagnosable in a period of 1 to 5 years after the initial negative analysis<sup>6,9-17</sup>. PubMed grows by over 1 million publications each year. Thus, the lack of capacity<sup>18</sup> to regularly reassess non-diagnostic clinical exome or genome sequencing in the light of newly published literature necessarily results in delayed diagnoses.

We have previously developed AMELIE<sup>19-21</sup> (Automatic Mendelian Literature Evaluation), a natural language processing and machine learning framework that automatically analyzes literature about Mendelian diseases and matches it to patients with undiagnosed Mendelian diseases to prioritize candidate causative genes in the patients' genomes. Here, we adapted the use of AMELIE to perform continuous reanalysis of undiagnosed patients with suspected Mendelian disease. The AMELIE-based reanalysis framework automatically compares *all* new literature to *all* undiagnosed patients and notifies clinicians (or diagnosticians; we use these interchangeably here) about newly published, likely diagnostic articles. To estimate the diagnostic rate and clinician burden of the reanalysis system, we performed a "time machine" experiment: first, we trained the reanalysis system only on Mendelian disease data available until December 2011. Subsequently, we assembled a cohort of 110 Mendelian singleton patients, of which 61 also had trio sequencing data available, who gradually became diagnosable after January 2012. Using this system, we performed an automatic reanalysis experiment in monthly intervals from 2012 to 2018, demonstrating a high diagnostic yield at very low clinician burden.

# Methods

## AMELIE-based automatic reanalysis

The automatic reanalysis framework presented here takes as input exome or genome sequencing data and a (manually or automated ClinPhen<sup>22</sup>-created) list of phenotypic abnormalities per patient. User-parameterized filtering of exome or genome sequencing data reveals a list of patient variants that are rare (e.g.,  $\leq 0.5\%$  minor allele frequency<sup>23</sup>) in the general population and hence potentially disease-causing. These are termed “candidate causative” variants. After sequencing, the patient’s candidate causative variants are analyzed for the presence of causative mutations using all knowledge available at the time. If the patient cannot be diagnosed shortly after sequencing, the patient’s relevant data (minimally consisting of a list of candidate causative variants and a list of phenotypic abnormalities observed in the patient) are added to a database of undiagnosed patients. Each patient is then reanalyzed automatically at monthly intervals until a diagnosis is successfully identified (Figure 1).

## AMELIE

AMELIE<sup>21</sup> performs two tasks: (1) automatically discovers and parses literature about Mendelian diseases to construct an “AMELIE knowledgebase”, and (2) estimates the likelihood that a given article contains a diagnosis for a patient through an “AMELIE classifier”. Here we build a computational framework around AMELIE that performs automatic reanalysis of undiagnosed patients with suspected Mendelian disease (Figure 1). For a detailed description of AMELIE, see Supplementary Methods and ref. <sup>21</sup>.

## AMELIE knowledgebase

The AMELIE knowledgebase is automatically constructed from articles about Mendelian diseases. Briefly, AMELIE knowledgebase construction is performed using a series of machine-learning classifiers<sup>21</sup> operating on text data. First, all PubMed abstracts available (30+ million currently) are classified in terms of their likelihood to discuss monogenic diseases. The full-text articles of potentially relevant abstracts are retrieved directly from the publishers. From each article’s full text, disease-causing genes and resulting clinical phenotypes are extracted. Mentioned genetic variants are retrieved using AVADA<sup>24</sup>. In addition, a set of full-text

classifiers assign scores to each article indicating whether it is most likely to be about a dominant or a recessive disease, and about protein-truncating (frameshift indel, stopgain, splicing) pathogenic variants or non-truncating (missense, nonframeshift indel) pathogenic variants. Information about mentioned phenotypic abnormalities, disease-causing genes, and disease inheritance modes, are extracted from these full text articles into the knowledgebase.

### **AMELIE classifier**

The AMELIE classifier estimates the likelihood that a given article contains a diagnosis for a particular patient. Given an article  $A$ , a patient's list of phenotypic abnormalities  $P$ , and a gene  $G$  containing candidate causative variants in the patient's genome, the AMELIE classifier<sup>21</sup> returns a diagnostic probability score between 0 and 100 (low to high) indicating how well the article  $A$  explains the patient's phenotypes  $P$  in light of the patient-specific variants in gene  $G$ .

### **Automatic reanalysis using AMELIE**

The automatic reanalysis framework takes a single parameter as input, termed “notification threshold”, a number (score) between 0 and 100. When a new article  $A$  about a disease-causing gene  $G$  is published and added to the AMELIE knowledgebase, the AMELIE classifier compares all known undiagnosed patients with a candidate causative variant in  $G$  to the article  $A$  and automatically sends a notification about the article if our “notification criterion” applies. We define the “notification criterion” as (1) article  $A$ 's diagnostic probability score is greater than or equal to the (global) notification threshold, and (2) article  $A$ 's diagnostic probability score is greater than or equal to the diagnostic probability score of previously published articles about the candidate gene  $G$  for the undiagnosed patient.

Patients who are successfully diagnosed after such notifications are removed from the database of undiagnosed patients. If a notification sent by the automatic reanalysis framework contains an article that, after clinician review, enables patient diagnosis, the notification is counted as “diagnostic”, or a “true positive”; if not, it is considered a “false positive” (Figure 1).

### **Patients**

To retrospectively test AMELIE-based automatic reanalysis, we assembled a cohort of 110 diagnosed patients with diseases where the causative gene was first published between January

2012 and May 2018 (Table 1, Supplementary Table S1). Patient data was obtained from the Deciphering Developmental Disorders (DDD) project<sup>25</sup>, the clinical genetics service at Stanford Children's Health (SCH), and the Undiagnosed Diseases Network (UDN)<sup>26</sup>. From these sources, we included all available patients with a single causative gene disease diagnosis for which the first supporting literature appeared after January 2012; had available exome or genome sequencing data containing the causative variant(s); and a list of clinician-noted or ClinPhen<sup>22</sup>-extracted phenotypes (Supplementary Methods). De-identified data from the DDD project were accessed via the European Genome-Phenome Archive<sup>27</sup> (study EGAS00001000775). As applicable to the participating patients, the study protocol was reviewed and approved by the Stanford University Institutional Review Board (IRB) and the central IRB at the NIH National Human Genome Research Institute for the Undiagnosed Diseases Network. Written informed consent was obtained from all participants. For each of the 110 patients, a clinician reviewed the literature about the patient's disease and manually identified a subset of articles, each with sufficient information to diagnose the case. The year and month in which the first article linking the patient's disease to the patient's causative gene was published were tagged as the patient's earliest possible date of literature-based diagnosis.

We defined candidate causative variants in singleton patient genomes as rare ( $\leq 0.5\%$  minor allele frequency in a large healthy control cohort<sup>23</sup>), non-silent exonic or core splice-site variants in protein-coding genes. For 61 of the 110 test patients, exome or genome sequencing data of 2 of the patient's unaffected relatives (usually parents) were available and the patient's causative variants were not identically observed in an unaffected relative. For trio patients, candidate variants were further filtered by segregation with the disease in the family (Table 1, Supplementary Table S1).

## Experimental design

For our time machine experiment, we built a version of the AMELIE knowledgebase and trained all machine learning components using only article data from 2011 or before. We then ran this AMELIE classifier, in monthly steps, on all PubMed data from January 2012 through May 2018, noting every notification generated at different notification thresholds (Figure 1).

## Performance Measures

We define the *number of diagnosed patients* as the number of test cohort patients who received a diagnostic notification within the experiment timeframe. The *wait time for diagnosis after publication of the first diagnostic article* is the number of months between the publication of the first diagnostic article and the sending of a diagnostic notification by AMELIE.

In a typical undiagnosed patient set, only a small fraction of patients become diagnosable every year<sup>6,9-17</sup>. Since our test patient cohort consists only of patients who become diagnosable within the experiment timeframe, reporting the number of false positives per diagnostic notification purely from the test cohort data would underestimate the number of false positive notifications per diagnostic notification in a cohort including patients not diagnosable before May 2018. We conducted a meta-analysis of manual reanalysis studies of undiagnosed patients with suspected Mendelian disease<sup>6,9-15</sup>. For each study, we collected the total number of patients, the number of patients receiving a reanalysis diagnosis due to updated literature (rather than other factors like improved variant calling pipelines), and the reanalysis timeframe. Based on these data, we used a meta-analysis statistic implemented by the R function “metarate” to estimate the expected fraction of undiagnosed patients that become newly diagnosable per year through growth of knowledge about Mendelian diseases. This rate was estimated as 6.74% (Supplementary Methods and Supplementary Table S2).

To calculate the number of false positive notifications per diagnostic notification and total clinician burden, we assume the existence of a typical undiagnosed patients’ database containing  $n$  patients. We estimate the average number of false positive notifications per patient per month  $f$  as the number of false positive notifications (FPs) per patient per month during the reanalysis experiment, calculated as  $\frac{1}{n} \sum_{patient} mean\_FPs\_per\_month(patient)$ . Further, we estimate the fraction  $p$  of diagnosable patients who receive a diagnostic notification by automatic reanalysis as the fraction of diagnosable test patients who receive a diagnostic notification in the reanalysis experiment timeframe. Based on these estimates, the expected annual number of diagnostic notifications equals  $6.74\% \cdot n \cdot p$  and the expected annual number of false positive notifications equals  $12 \cdot f \cdot n$ . Thus, given a scenario in which 6.74% of patients in an



undiagnosed patients database become diagnosable within a year, the expected number of false positive notifications per diagnostic notification equals  $\frac{12 \cdot f}{0.0674 \cdot p}$  and the total evaluation burden on clinicians, per patient per year, is  $6.74\% \cdot p + 12 \cdot f$ .

### **Comparison of AMELIE-based reanalysis to a simple abstract-based approach**

To estimate the efficiency gain of AMELIE-based reanalysis over a manual abstract-based reanalysis approach, we defined the 20 most cited Mendelian disease journals as the most-cited journals in the Human Gene Mutation Database (HGMD), which aims to comprehensively curate Mendelian disease-causing mutations from the primary literature<sup>28</sup> (Supplementary Table S3 and Supplementary Methods). For each patient, we assembled a surveillance list of all articles mentioning at least one patient candidate causative gene in the 20 most cited Mendelian disease journals that were published between the start of the reanalysis experiment and the publication of the first diagnostic article for the patient. The first diagnostic article was contained in this surveillance list for 82-83% of patients (91 of 110 of singleton patients and 51 of 61 of trio patients). Consequently, we estimated the *efficiency gain of automatic reanalysis compared to tracking the 20 most cited Mendelian disease journals* for a patient equals the number of articles about any of the patient's candidate causative genes in the 20 most cited journals about Mendelian disease until publication of the first diagnostic article divided by the number of AMELIE-based automatic reanalysis notifications for the patient.

### **Notification threshold calibration**

The automatic (global) reanalysis notification threshold can be adjusted to achieve high sensitivity (aiming for a large fraction of diagnosed patients), or high precision (aiming for a low number of false positives per diagnostic notification). We report the measures defined above for 3 differently calibrated notification thresholds: (a) a “*high-sensitivity*” notification threshold, in which the clinician receives diagnostic notifications for at least 80% of diagnosable patients, comparable in recall to tracking the top 20 journals above, at the lowest possible clinician burden, (b) a “*high-precision*” approach, in which at most 3 false positives per diagnostic notification are sent on average at the highest possible true positive rate, and (c) a “*minimal*

*interruptions*” (even higher precision) approach, in which the majority of notifications sent are diagnostic, at the highest possible true positive rate.

## Results

Table 2 summarizes the outcomes of the reanalysis experiment. The fraction of diagnosed patients and total number of notifications per patient per year is shown in Figure 2. The automatic reanalysis timeline of three examples of singleton patients is presented in Table 3. Automatic reanalysis on singleton data could be calibrated for high sensitivity or high precision; achieving high sensitivity and precision simultaneously was possible with trio data. Both modes of operation resulted in between 86 and 893 times fewer abstracts to consider compared to manual reanalysis by tracking abstracts in the 20 most cited Mendelian disease journals.

### Singletons

We ran singleton analysis on all 110 patients. By manually tracking articles (only) about patient candidate causative genes in the 20 most cited Mendelian disease journals, clinicians would need to evaluate an average of 892 articles per diagnosable patient from the start of the reanalysis experiment until the publication of the first diagnostic article.

In contrast, our automatic reanalysis system is powerful enough to attain “high sensitivity”, where 80% of all diagnosable patients trigger a diagnostic notification, 58% of them immediately upon publication of the first diagnostic article, at an average of only 1.05 notification per patient per year (Figure 2 and Table 2). In “high precision” mode false positive notifications are reduced by 80%, while 44% of diagnosable singleton patients receive a diagnostic alert, at an average rate of only 0.17 notifications per patient per year. And in “minimal interruptions” mode, only 22% of diagnosable singleton patients receive a diagnostic notification, but the majority of notifications sent by the system are diagnostic, at a minimal 0.05 notifications per patient per year.

Thus, automatic reanalysis with the above notification thresholds for high sensitivity, high precision, or minimal interruptions, requires following up on 361-893 times fewer articles compared to manual reanalysis surveillance overall, amounting to only a couple of article alerts

per patient.

## **Trios**

In the case of manual reanalysis for our 61 trio patients, clinicians would examine an average of 131 articles about candidate causative genes per patient by tracking abstracts in the 20 most cited Mendelian disease journals from start of the reanalysis experiment to the publication of the first diagnostic article.

In contrast, automatic trio reanalysis in “high sensitivity” mode resulted in an 82% diagnosis rate, at 0.53 notifications per patient per year, or half the clinician burden of comparable singleton reanalysis. “High precision” mode was very similar, resulting in over 75% of diagnoses. And in “minimal interruptions” mode, the diagnosis rate was still 46% of diagnosable patients with the majority of notifications leading to diagnosis, at an impressive 0.12 notifications per patient per year.

Thus, automatic reanalysis as presented here requires following up on 86-145 times fewer articles per patient compared to manual reanalysis by tracking abstracts in the 20 most cited Mendelian disease journals.

## **Web portal**

We have launched a web portal containing a working implementation of AMELIE analysis<sup>21</sup> followed by automatic reanalysis at <https://amelie.stanford.edu>. The updated website is trained on current PubMed (as opposed to 2011 in above experiment), and it performs daily literature updates by automatically parsing and classifying newly indexed PubMed entries, downloading full text of relevant articles, and inserting extracted knowledge from full-text articles into the AMELIE knowledgebase. For demonstration purposes users can sign up for individual accounts and enable automatic reanalysis notifications (delivered by email) for selected patients at user-defined notification thresholds. Customizable singleton and trio variant filtering based on gnomAD variant frequency data<sup>29</sup> is supported.

## Discussion

We present here a retrospective analysis of an automatic reanalysis framework on both singleton patients and trios diagnosed with Mendelian disorders over the span of over six years. We showed that automatic reanalysis can already be used to reveal diagnoses for patients with suspected Mendelian disease who could not be previously diagnosed at a very acceptable notification burden, while requiring dramatically less work of clinicians as compared to manual reanalysis. By simply tracking abstracts pertaining to patient candidate causative genes in the 20 most cited Mendelian disease journals, clinicians have to review hundreds of articles per diagnosable patient from the start of our reanalysis experiment to diagnosis.

In 2016 we were among the first to publish on the value of reanalysis<sup>6</sup>. From 40 cases we were able to diagnose 4. This 10% yield (on cases accumulated over multiple years) has since held up for a great number of similar studies by other groups over their undiagnosed patients. Here our sample size is bigger, and we expect it to be similarly representative of continuous patient reanalysis at under 1 notification per patient per year. Moreover, AMELIE's "time machine" performance here was obtained while training *only* on 2011 data, not long after next generation sequencing became available in the clinic. It should be seen as a lower bound on AMELIE's actual performance, as the AMELIE web portal is trained on nearly a decade of additional years of accumulated knowledge. Performance would further improve should the conservative expected rate of reanalysis diagnoses per year we estimate at 6.7% be higher.

A mass of sequenced but undiagnosed patients is already accruing<sup>17</sup>. CLIA-certified exome data production now costs only a few hundred dollars. A wave of data – millions of sequenced patients<sup>3</sup>, and tens of thousands of articles on Mendelian disease genes<sup>21</sup> – is coming the way of fewer than a thousand clinical laboratory geneticists in the U.S.<sup>30</sup> and their peers worldwide. Germline exome and genome sequencing data, in contrast to results from many other diagnostic tests, do not expire. As our knowledge about disease-causing genetic variation constantly grows, manual reinterpretation of patient sequencing data can at best be done periodically. In Mendelian diagnosis alone, a substantial 70% of cases will not be diagnosed at initial analysis<sup>5</sup>, and yet, as estimated here, a meaningful ~6.7% will become diagnosable with each subsequent year that

passes on new knowledge alone. This accumulating load will greatly weigh on any interpretation service. Automation, as we show, can realize the promise of continuous reanalysis and timely diagnosis for all, and will be essential to handle the incoming flood of healthcare data and insights.

Our AMELIE-based reanalysis framework has limitations, catching only 80% of diagnosable cases even in high sensitivity mode. But what diagnoses it finds, it offers with an efficiency gain of ~100-1000-fold over the – unsustainable – current standard of manual curation. Importantly, our system does not replace clinicians, but rather augments their capabilities. If a medical institute or lab devotes a certain number of work hours to re/analysis, a small fraction of this time should be devoted to resolving our system’s notifications. The remainder can certainly be spent on more open-ended explorations, and all lessons learned (both inside and outside the system) can be incorporated to make such resident clinical support systems better and better over time.

Traditionally, patient cases are most often reassessed at the time of a new clinical encounter. The rapid accumulation of medical knowledge pressures this paradigm as the significance of one’s health record can change dramatically between visits. On any given day, a patient may become diagnosable and a portion of such diagnoses are expected to be immediately actionable. At the same time, logistical and cost constraints currently prevent the regular reanalysis of many patient cases following non-diagnostic sequencing. Together with automated phenotype extraction tools from the electronic medical record, like ClinPhen<sup>22</sup>, AMELIE demonstrates the potential of a scalable means of regular reanalysis for undiagnosed patients, which can also encompass emerging incidentals. This has implications for the care of patients with undiagnosed genetic disease and more broadly. The promise of efficient, continuous, automated identification of latent, actionable diagnoses in patient data has the potential to significantly improve health outcomes across care settings.

## Acknowledgments

We would like to thank Erich Weiler for continuous support and guidance. We thank the members of the Bejerano lab for technical advice and helpful discussions. We thank Victoria

Wang, Max Haeussler, Mark E. Diekhans, Natalie T. Deutch, and Laura E. Hayward for helpful input. We thank Elijah Kravets, Julia Buckingham and Kirstie MacMillan for study coordination. We thank the European Genome-Phenome Archive<sup>27</sup> (EGA) and the Deciphering Developmental Disorders (DDD) project<sup>25</sup> for data sharing. The DDD study presents independent research commissioned by the Health Innovation Challenge Fund [grant HICF-1009-003], a parallel funding partnership between the Wellcome Trust and the Department of Health, and the Wellcome Trust Sanger Institute [grant WT098051]. The views expressed in this publication are those of the author(s) and not necessarily those of the Wellcome Trust or the Department of Health. The study has UK Research Ethics Committee approval (10/H0305/83, granted by the Cambridge South REC, and GEN/284/12 granted by the Republic of Ireland REC). Deidentified DDD data was obtained through EGA. The research team acknowledges the support of the National Institute for Health Research, through the Comprehensive Clinical Research Network. The authors would like to thank the Genome Aggregation Database (gnomAD) and the groups that provided exome and genome variant data to this resource. A full list of contributing groups can be found at <http://gnomad.broadinstitute.org/about>. UDN data were obtained directly from the UDN. **Funding:** All computational work was funded only by a Bio-X SIGF fellowship (JB), the Stanford Department of Pediatrics (JAB, GB), a Packard Foundation Fellowship (GB), and a Microsoft Faculty Fellowship (GB). UDN curated data used in this manuscript was supported by the NIH Common Fund, through the Office of Strategic Coordination/Office of the NIH Director under Award Numbers U01HG007709, U01HG007672, U01HG007690, U01HG007708, U01HG007674, U01HG007942 and U01HG007943. The content is solely the responsibility of the authors and does not necessarily represent the official views of the National Institutes of Health. A list of UDN collaborators is available in Supplementary Table S4.

## Author contributions

JB and GB designed the study and analyzed the results. JB and ES implemented the text mining software, website and associated databases. EEB verified diagnostic articles for the purposes of the reanalysis experiment. CAD and KAJ processed patient data. JNK, DB, SM, JAMA, SN, CGP, JDC, RH, JMS, JBK, JAR, PM, DRA, VS, EAW, CME, EAA, MTW, and UDN provided curated patient data. PDS and DNC curated HGMD. JAB provided guidance on clinical aspects

of study design, testing set construction and interpretation of results. JB, JAB, and GB wrote the manuscript. All authors commented on and approved the manuscript. GB guided the study.

### **Conflict of Interest**

DNC and PDS acknowledge the receipt of financial support from Qiagen Inc through a License Agreement with Cardiff University. The Department of Molecular and Human Genetics at Baylor College of Medicine receives revenue from clinical genetic testing completed at Baylor Genetics. EAA is advisor to Apple, co-founder of Personalis Inc., and of DeepCell Inc. MTW is a stockholder of Personalis. The remaining authors declare no conflict of interest.

## References

1. Church G. Compelling Reasons for Repairing Human Germlines. *N Engl J Med* 2017;377(20):1909–11.
2. Blencowe H, Moorthie S, Petrou M, et al. Rare single gene disorders: estimating baseline prevalence and outcomes worldwide. *J Community Genet* 2018;9(4):397–406.
3. Birney E, Vamathevan J, Goodhand P. Genomics in healthcare: GA4GH looks to 2022. *bioRxiv* 2017;203554.
4. Dragojlovic N, Elliott AM, Adam S, et al. The cost and diagnostic yield of exome sequencing for children with suspected genetic disorders: a benchmarking study. *Genet Med* 2018;20(9):1013.
5. Yang Y, Muzny DM, Reid JG, et al. Clinical whole-exome sequencing for the diagnosis of mendelian disorders. *N Engl J Med* 2013;369(16):1502–11.
6. Wenger AM, Guturu H, Bernstein JA, Bejerano G. Systematic reanalysis of clinical exome data yields additional diagnoses: implications for providers. *Genet Med* 2017;19(2):209–214 (ePub 2016).
7. Bamshad MJ, Nickerson DA, Chong JX. Mendelian Gene Discovery: Fast and Furious with No End in Sight. *Am J Hum Genet* 2019;105(3):448–55.
8. Stenson PD, Mort M, Ball EV, et al. The Human Gene Mutation Database (HGMD®): optimizing its use in a clinical diagnostic or research setting. *Hum Genet* 2020;
9. Nambot S, Thevenon J, Kuentz P, et al. Clinical whole-exome sequencing for the diagnosis of rare disorders with congenital anomalies and/or intellectual disability: substantial interest of prospective annual reanalysis. *Genet Med* 2018;20(6):645–54.
10. Need AC, Shashi V, Schoch K, Petrovski S, Goldstein DB. The importance of dynamic reanalysis in diagnostic whole exome sequencing. *J Med Genet* 2017;54(3):155–6.
11. Costain G, Jobling R, Walker S, et al. Periodic reanalysis of whole-genome sequencing data enhances the diagnostic advantage over standard clinical genetic testing. *Eur J Hum Genet* 2018;26(5):740–4.
12. Xiao B, Qiu W, Ji X, et al. Marked yield of re-evaluating phenotype and exome/target sequencing data in 33 individuals with intellectual disabilities. *Am J Med Genet A* 2018;176(1):107–15.



13. Ewans LJ, Schofield D, Shrestha R, et al. Whole-exome sequencing reanalysis at 12 months boosts diagnosis and is cost-effective when applied early in Mendelian disorders. *Genet Med* 2018;20(12):1564.
14. Eldomery MK, Coban-Akdemir Z, Harel T, et al. Lessons learned from additional research analyses of unsolved clinical exome cases. *Genome Med* 2017;9(1):26.
15. Shashi V, Schoch K, Spillmann R, et al. A comprehensive iterative approach is highly effective in diagnosing individuals who are exome negative. *Genet Med* 2018;161–72.
16. Baker SW, Murrell JR, Nesbitt AI, et al. Automated Clinical Exome Reanalysis Reveals Novel Diagnoses. *J Mol Diagn JMD* 2019;21(1):38–48.
17. Liu P, Meng L, Normand EA, et al. Reanalysis of Clinical Exome Sequencing Data. *N Engl J Med* 2019;380(25):2478–80.
18. Maiese DR, Keehn A, Lyon M, Flannery D, Watson M, Working Groups of the National Coordinating Center for Seven Regional Genetics Service Collaboratives. Current conditions in medical genetics practice. *Genet Med Off J Am Coll Med Genet* 2019;21(8):1874–7.
19. Birgmeier J, Haeussler M, Deisseroth CA, et al. AMELIE accelerates Mendelian patient diagnosis directly from the primary literature. *bioRxiv* 2017;171322.
20. Birgmeier J, Haeussler M, Deisseroth CA, et al. AMELIE 2 speeds up Mendelian diagnosis by matching patient phenotype & genotype to primary literature. *bioRxiv* 2019;839878.
21. Birgmeier J, Haeussler M, Deisseroth CA, et al. AMELIE speeds Mendelian diagnosis by matching patient phenotype and genotype to primary literature. *Sci Transl Med* 2020;12(544).
22. Deisseroth CA, Birgmeier J, Bodle EE, et al. ClinPhen extracts and prioritizes patient phenotypes directly from medical records to expedite genetic disease diagnosis. *Genet Med* 2018;1.
23. Karczewski KJ, Francioli LC, Tiao G, et al. Variation across 141,456 human exomes and genomes reveals the spectrum of loss-of-function intolerance across human protein-coding genes. *bioRxiv* 2019;531210.
24. Birgmeier J, Deisseroth CA, Hayward LE, et al. AVADA: toward automated pathogenic variant evidence retrieval directly from the full-text literature. *Genet Med* 2019;1–9.
25. Deciphering Developmental Disorders Study. Large-scale discovery of novel genetic causes of developmental disorders. *Nature* 2015;519(7542):223–8.

26. Ramoni RB, Mulvihill JJ, Adams DR, et al. The Undiagnosed Diseases Network: Accelerating Discovery about Health and Disease. *Am J Hum Genet* 2017;100(2):185–92.
27. Lappalainen I, Almeida-King J, Kumanduri V, et al. The European Genome-phenome Archive of human data consented for biomedical research. *Nat Genet* 2015;47(7):692–5.
28. Stenson PD, Mort M, Ball EV, et al. The Human Gene Mutation Database: towards a comprehensive repository of inherited mutation data for medical research, genetic diagnosis and next-generation sequencing studies. *Hum Genet* 2017;136(6):665–77.
29. Lek M, Karczewski KJ, Minikel EV, et al. Analysis of protein-coding genetic variation in 60,706 humans. *Nature* 2016;536(7616):285–91.
30. Providers begin to use genomic testing in mapping patient care. *Health Data Manag* [Internet] 2018;Available from: <https://www.healthdatamanagement.com/news/providers-begin-to-use-genomic-testing-in-mapping-patient-care>
31. Gray KA, Yates B, Seal RL, Wright MW, Bruford EA. Genenames.org: the HGNC resources in 2015. *Nucleic Acids Res* 2015;43(Database issue):D1079-1085.
32. Bateman A, Martin MJ, O'Donovan C, et al. UniProt: the universal protein knowledgebase. *Nucleic Acids Res* 2017;45(D1):D158–69.
33. Jurafsky D, Martin JH. *Speech and Language Processing* (2Nd Edition). Upper Saddle River, NJ, USA: Prentice-Hall, Inc.; 2009.
34. Amberger JS, Bocchini CA, Schiettecatte F, Scott AF, Hamosh A. OMIM.org: Online Mendelian Inheritance in Man (OMIM®), an online catalog of human genes and genetic disorders. *Nucleic Acids Res* 2015;43(Database issue):D789-798.
35. Haeussler M. Download, convert and process the full text of scientific articles: maximilianh/pubMunch3 [Internet]. 2018. Available from: <https://github.com/maximilianh/pubMunch3>
36. Pedregosa F, Varoquaux G, Gramfort A, et al. Scikit-learn: machine learning in python. *J Mach Learn Res* 2011;12:2825–2830.
37. 1000 Genomes Project Consortium, Auton A, Brooks LD, et al. A global reference for human genetic variation. *Nature* 2015;526(7571):68–74.
38. Landrum MJ, Lee JM, Benson M, et al. ClinVar: improving access to variant interpretations and supporting evidence. *Nucleic Acids Res* 2018;46(D1):D1062–7.
39. Li H. Aligning sequence reads, clone sequences and assembly contigs with BWA-MEM. *ArXiv13033997 Q-Bio* [Internet] 2013;Available from: <http://arxiv.org/abs/1303.3997>

40. Broad Institute, Picard Tools. Picard Tools - By Broad Institute [Internet]. 2017;Available from: <http://broadinstitute.github.io/picard/>
41. DePristo MA, Banks E, Poplin R, et al. A framework for variation discovery and genotyping using next-generation DNA sequencing data. *Nat Genet* 2011;43(5):491–8.
42. Girdea M, Dumitriu S, Fiume M, et al. PhenoTips: patient phenotyping software for clinical and research use. *Hum Mutat* 2013;34(8):1057–65.
43. Danecek P, Auton A, Abecasis G, et al. The variant call format and VCFtools. *Bioinformatics* 2011;27(15):2156–8.
44. Wang K, Li M, Hakonarson H. ANNOVAR: functional annotation of genetic variants from high-throughput sequencing data. *Nucleic Acids Res* 2010;38(16):e164.
45. Schwarzer G. meta: An R package for meta-analysis. *R News* 2007;7(3):40–45.
46. Wei C-H, Kao H-Y, Lu Z. PubTator: a web-based text mining tool for assisting biocuration. *Nucleic Acids Res* 2013;41(Web Server issue):W518-522.

# Figures

Figure 1.

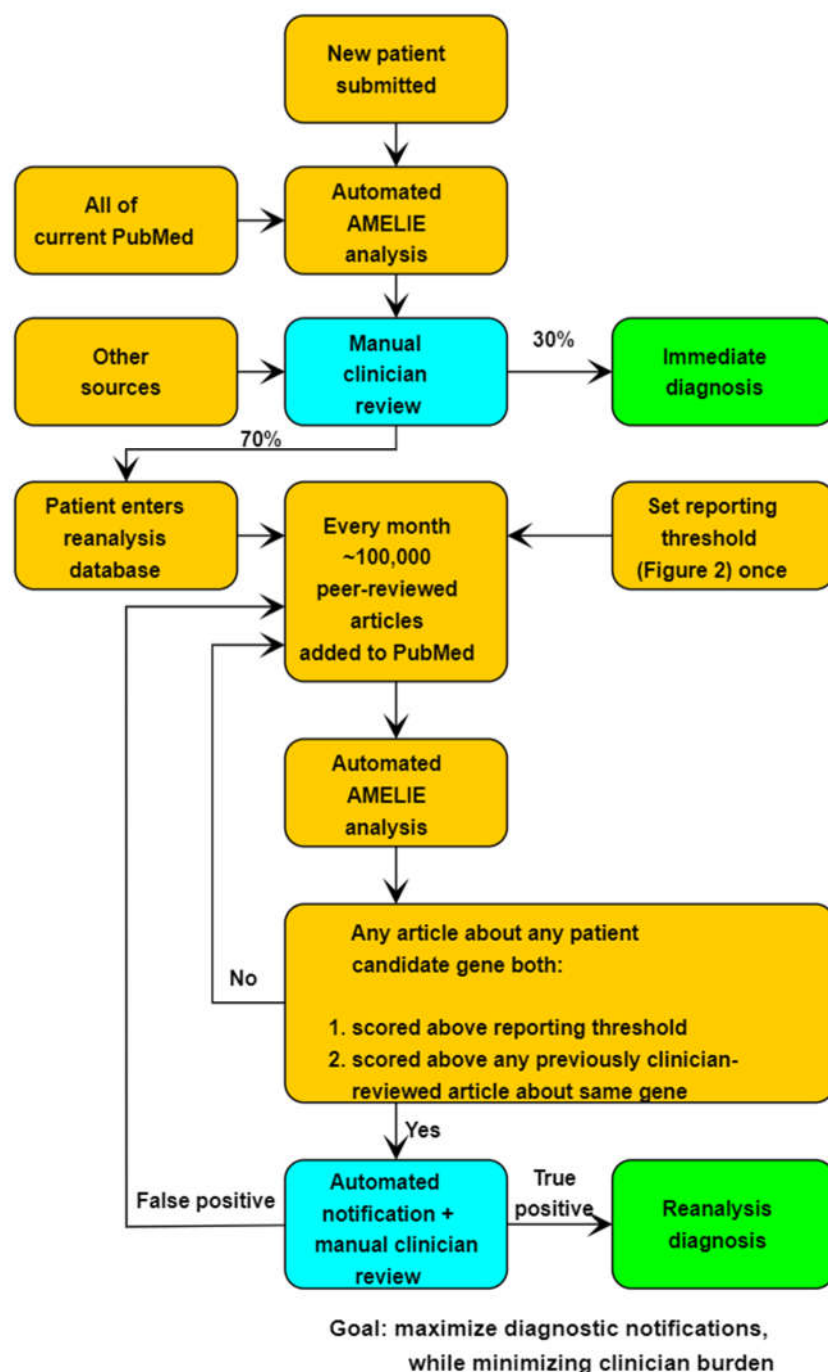

**Figure 1. Automatic reanalysis of patients with undiagnosed Mendelian diseases.** After sequencing, clinicians examine the automated AMELIE analysis in search of a diagnosis. If a diagnosis is not available (currently in ~70% of all cases), the patient's information is entered into a reanalysis database. Every month, AMELIE matches all newly published literature against every patient candidate causative variant and phenotypes to seek new diagnoses. If a newly published article is flagged as being possibly diagnostic, it is reviewed by clinicians, resulting in either diagnosis or continuation of AMELIE-based automatic reanalysis. See example, reanalysis notifications in Table 3.

**Figure 2.**

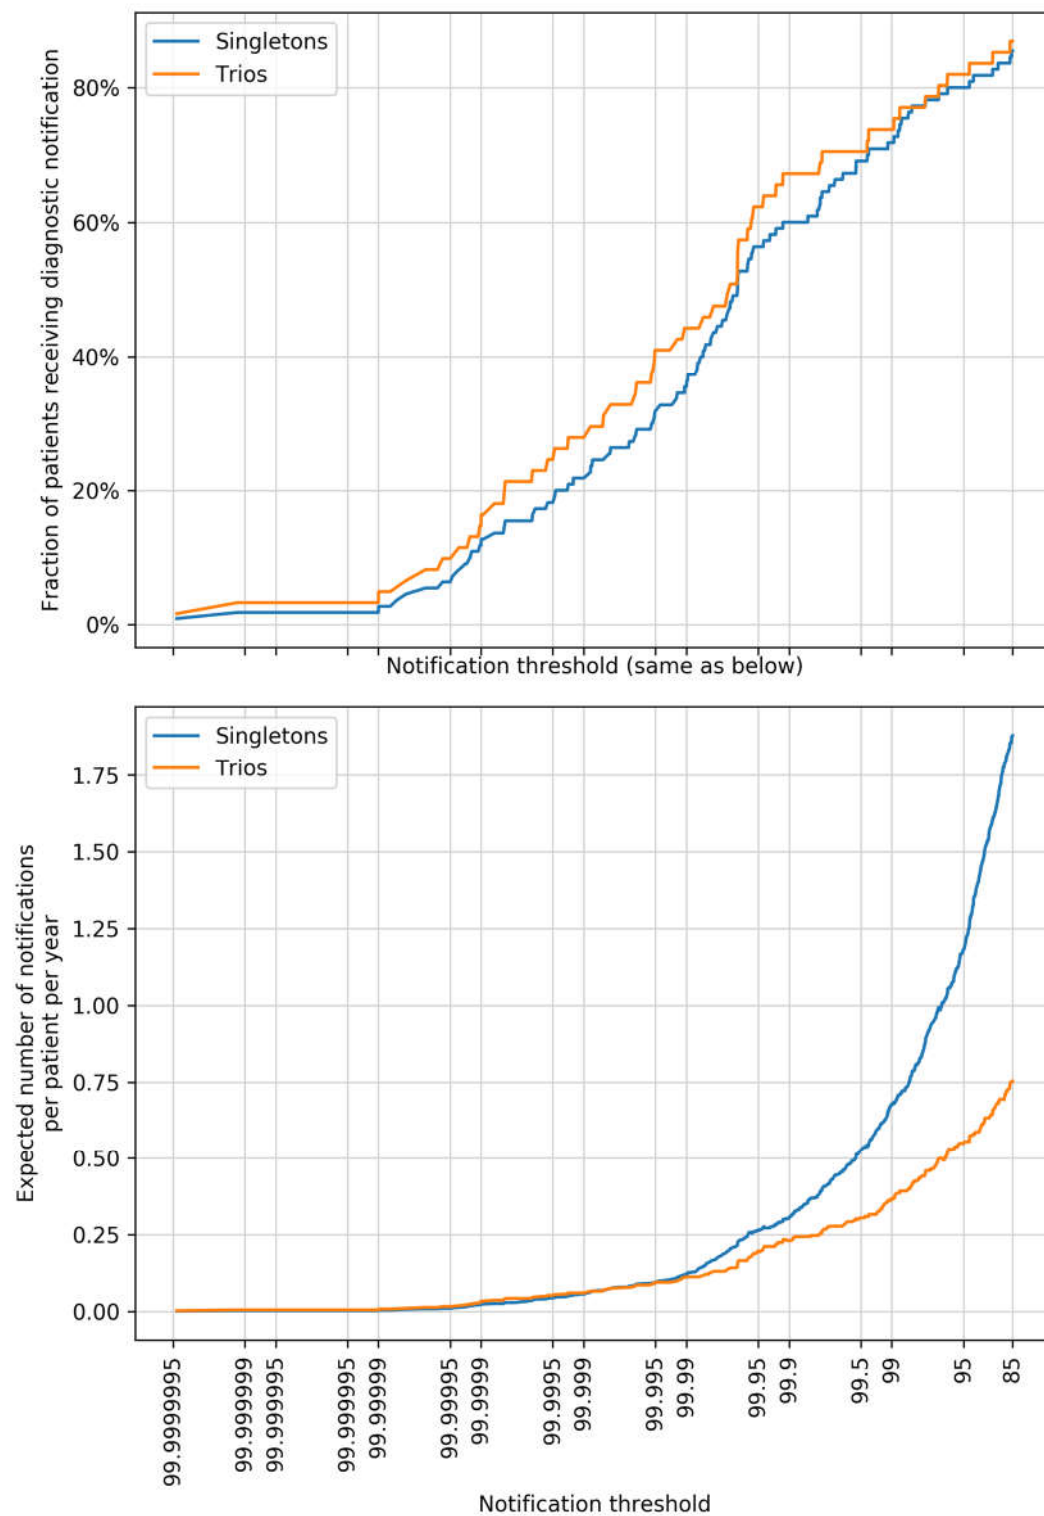

**Figure 2. Fraction of diagnosed patients and average clinician burden per patient per year across notification thresholds.** Both panels have the same x-axis so that matching values can read simultaneously from both. **(Upper panel)** The fraction of diagnosable test cohort patients who received a diagnostic notification (i.e., true positive) during the 6.5 year reanalysis experiment timeframe across notification thresholds. **(Lower panel)** The expected total number of notifications (or clinician burden) per patient per year across notification thresholds, including both diagnostic notifications and false positive notifications. For example, the system detects 80% of diagnosable singletons (trios) at the low burden of 1 (0.5) notification per patient per year.

## Tables

**Table 1. Clinical characteristics of patient cohort**

|                                                                                                                              | Singletons  | Trios subset |
|------------------------------------------------------------------------------------------------------------------------------|-------------|--------------|
| <b>Number of patients</b>                                                                                                    | 110         | 61           |
| <b>Male sex - number (percent)</b>                                                                                           | 47 (42.7%)  | 24 (39.3%)   |
| <b>Phenotypic abnormalities in ... - number (percent)</b>                                                                    |             |              |
| Blood and blood-forming tissues                                                                                              | 6 (5.5%)    | 5 (8.2%)     |
| Breast                                                                                                                       | 6 (5.5%)    | 4 (6.6%)     |
| Cardiovascular system                                                                                                        | 25 (22.7%)  | 16 (26.2%)   |
| Connective tissue                                                                                                            | 17 (15.5%)  | 11 (18.0%)   |
| Digestive system                                                                                                             | 35 (31.8%)  | 21 (34.4%)   |
| Ear                                                                                                                          | 23 (20.9%)  | 17 (27.9%)   |
| Endocrine system                                                                                                             | 15 (13.6%)  | 12 (19.7%)   |
| Eye                                                                                                                          | 38 (34.5%)  | 27 (44.3%)   |
| Genitourinary system                                                                                                         | 17 (15.5%)  | 6 (9.8%)     |
| Growth                                                                                                                       | 34 (30.9%)  | 18 (29.5%)   |
| Head or neck                                                                                                                 | 66 (60.0%)  | 40 (65.6%)   |
| Immune system                                                                                                                | 10 (9.1%)   | 7 (11.5%)    |
| Integument                                                                                                                   | 36 (32.7%)  | 21 (34.4%)   |
| Limbs                                                                                                                        | 42 (38.2%)  | 27 (44.3%)   |
| Metabolism/homeostasis                                                                                                       | 20 (18.2%)  | 12 (19.7%)   |
| Musculature                                                                                                                  | 47 (42.7%)  | 31 (50.8%)   |
| Neoplasm                                                                                                                     | 6 (5.5%)    | 3 (4.9%)     |
| Nervous system (incl. intellectual disability)                                                                               | 102 (92.7%) | 58 (95.1%)   |
| Prenatal development or birth                                                                                                | 22 (20.0%)  | 14 (23.0%)   |
| Respiratory system                                                                                                           | 23 (20.9%)  | 14 (23.0%)   |
| Skeletal system                                                                                                              | 66 (60.0%)  | 39 (63.9%)   |
| Voice                                                                                                                        | 2 (1.8%)    | 2 (3.3%)     |
| <b>Number of distinct HPO* phenotypic abnormalities across all patients</b>                                                  | 715         | 558          |
| <b>Median number of HPO* phenotypic abnormalities per patient</b>                                                            | 6           | 8            |
| <b>Number of distinct OMIM** diseases (1 per patient) across all patients</b>                                                | 74          | 44           |
| <b>Genetic characteristics</b>                                                                                               |             |              |
| Median number of candidate causative variants*** per patient                                                                 | 312         | 25           |
| Median number of candidate causative genes**** per patient                                                                   | 274         | 20           |
| Number of distinct causative genes across all patients                                                                       | 74          | 44           |
| *Human Phenotype Ontology (HPO), a database organizing human phenotypic abnormalities                                        |             |              |
| **Online Mendelian Inheritance in Man (OMIM), a database organizing Mendelian diseases                                       |             |              |
| ***Patient variants occurring at $\leq 0.5\%$ allele frequency in a large healthy control cohort (see Supplementary Methods) |             |              |
| ****Genes containing at least one candidate causative variant                                                                |             |              |



**Table 2. Reanalysis experiment outcomes**

| AMELIE-based automatic reanalysis                                                          |                  |                |                       |                  |                |                       |
|--------------------------------------------------------------------------------------------|------------------|----------------|-----------------------|------------------|----------------|-----------------------|
|                                                                                            | Singletons       |                |                       | Trios            |                |                       |
| Reanalysis mode                                                                            | High sensitivity | High precision | Minimal interruptions | High sensitivity | High precision | Minimal interruptions |
| Notification threshold (rounded)                                                           | 96.456           | 99.982         | 99.999                | 96.182           | 98.948         | 99.985                |
| Diagnosed patients [number (percent)]                                                      | 88 (80.00%)      | 48 (43.64%)    | 24 (21.82%)           | 50 (81.97%)      | 46 (75.41%)    | 28 (45.90%)           |
| Median wait time* for diagnosis after publication of the first diagnostic article [months] | 0                | 4.5            | 0                     | 0                | 0              | 1                     |
| Average number of notifications** per patient per year                                     | 1.05             | 0.17           | 0.05                  | 0.53             | 0.37           | 0.12                  |
| Expected number of false positives per diagnostic notification***                          | 14.22            | 2.95           | 0.84                  | 4.25             | 2.71           | 0.83                  |

  

| Manual reanalysis based on tracking abstracts in top 20 journals about Mendelian disease                                                                                                   |      |      |      |     |     |      |
|--------------------------------------------------------------------------------------------------------------------------------------------------------------------------------------------|------|------|------|-----|-----|------|
| Average number of articles, only about candidate genes, per patient in 20 most cited journals about Mendelian disease, from start of reanalysis to publication of first diagnostic article | 892  |      |      | 131 |     |      |
| Average efficiency gain**** of automatic reanalysis compared to tracking these top 20 journals                                                                                             | 361x | 676x | 893x | 86x | 99x | 145x |

\*Across all patients who were diagnosed at this notification threshold

\*\*Arithmetic mean across all patients in the test cohort

\*\*\*Assuming 6.74% of undiagnosed patients become diagnosable each year due to growth of knowledge

\*\*\*\*Arithmetic mean across all patients in the test cohort with at least one reanalysis notification

**Table 3. Automatic reanalysis notifications of three singleton patients, starting January 2012**

| Notification date*,**                                                                                                                            | Notification class | Reported Gene | Article title                                                                                                                                | Article first author and journal                              |
|--------------------------------------------------------------------------------------------------------------------------------------------------|--------------------|---------------|----------------------------------------------------------------------------------------------------------------------------------------------|---------------------------------------------------------------|
| <b>Patient082. Diagnosis: "Metabolic encephalomyopathic crises, recurrent, with rhabdomyolysis, cardiac arrhythmias, and neurodegeneration".</b> |                    |               |                                                                                                                                              |                                                               |
| <b>Causative gene: TANGO2. First diagnosable*: January 2016.</b>                                                                                 |                    |               |                                                                                                                                              |                                                               |
| (no notifications for 4 years, until: )                                                                                                          |                    |               |                                                                                                                                              |                                                               |
| January 2016                                                                                                                                     | Diagnostic         | TANGO2        | Recurrent Muscle Weakness with Rhabdomyolysis, Metabolic Crises, and Cardiac Arrhythmia Due to Bi-allelic TANGO2 Mutations.                  | Lalani SR et al., American Journal of Human Genetics          |
| <b>Patient032. Diagnosis: "Epileptic encephalopathy, childhood-onset".</b>                                                                       |                    |               |                                                                                                                                              |                                                               |
| <b>Causative gene: CHD2. First diagnosable*: May 2013.</b>                                                                                       |                    |               |                                                                                                                                              |                                                               |
| May 2013                                                                                                                                         | Missed             | CHD2          | Targeted resequencing in epileptic encephalopathies identifies de novo mutations in CHD2 and SYNGAP1.                                        | Carvill GL et al., Nature Genetics                            |
| November 2013                                                                                                                                    | Diagnostic         | CHD2          | De novo loss-of-function mutations in CHD2 cause a fever-sensitive myoclonic epileptic encephalopathy sharing features with Dravet syndrome. | Suls A et al., American Journal of Human Genetics             |
| <b>Patient073. Diagnosis: "Mental retardation, X-linked 102".</b>                                                                                |                    |               |                                                                                                                                              |                                                               |
| <b>Causative gene: DDX3X. First diagnosable*: August 2015.</b>                                                                                   |                    |               |                                                                                                                                              |                                                               |
| October 2012                                                                                                                                     | False positive     | COL4A1        | Novel COL4A1 mutations cause cerebral small vessel disease by haploinsufficiency.                                                            | Lemmens R et al., Human Molecular Genetics                    |
| September 2014                                                                                                                                   | False positive     | AFG3L2        | Deletion of AFG3L2 associated with spinocerebellar ataxia type 28 in the context of multiple genomic anomalies.                              | Myers KA et al., American Journal of Medical Genetics. Part A |
| August 2015                                                                                                                                      | Diagnostic         | DDX3X         | Mutations in DDX3X Are a Common Cause of Unexplained Intellectual Disability with Gender-Specific Effects on Wnt Signaling                   | Snijders Blok L et al., American Journal of Human Genetics    |
| *PubMed publication date                                                                                                                         |                    |               |                                                                                                                                              |                                                               |
| **For singleton analysis at notification threshold 99.982 ("high precision" threshold)                                                           |                    |               |                                                                                                                                              |                                                               |
